# Supplementary material for: Intestinal stem cell aging at single‐cell resolution: Transcriptional perturbations alter cell developmental trajectory reversed by gerotherapeutics
Source: PubMed Central journal article supplement (PMC10186593; doi:10.1111/acel.13802), 2023-03-02

## **Supplementary figures**

**Figure S1**

**a FACS gating strategy for total epithelial cells (Epcam+, CD45neg)**

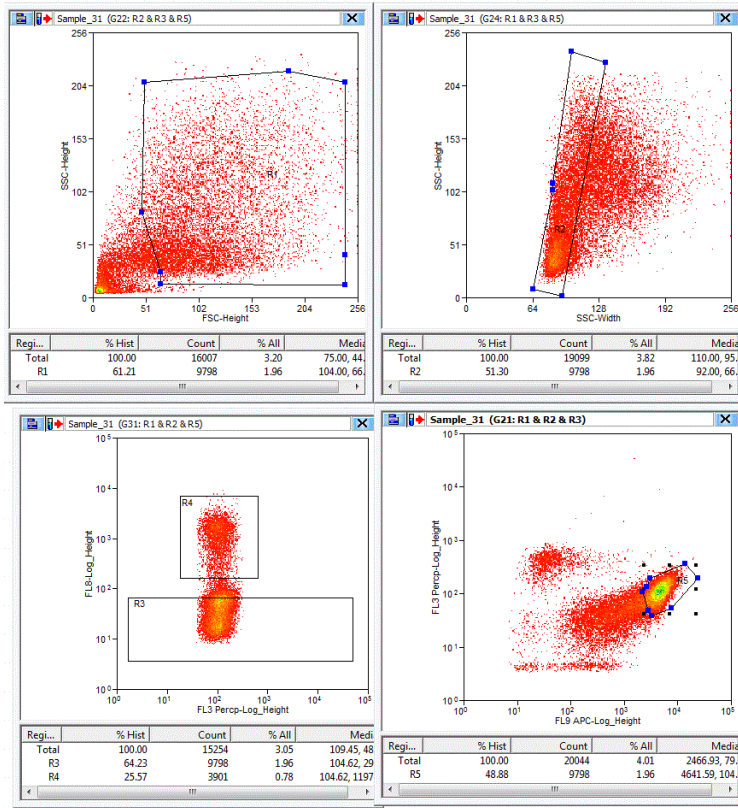

**b Expression of cell type and lineage markers in cell clusters**

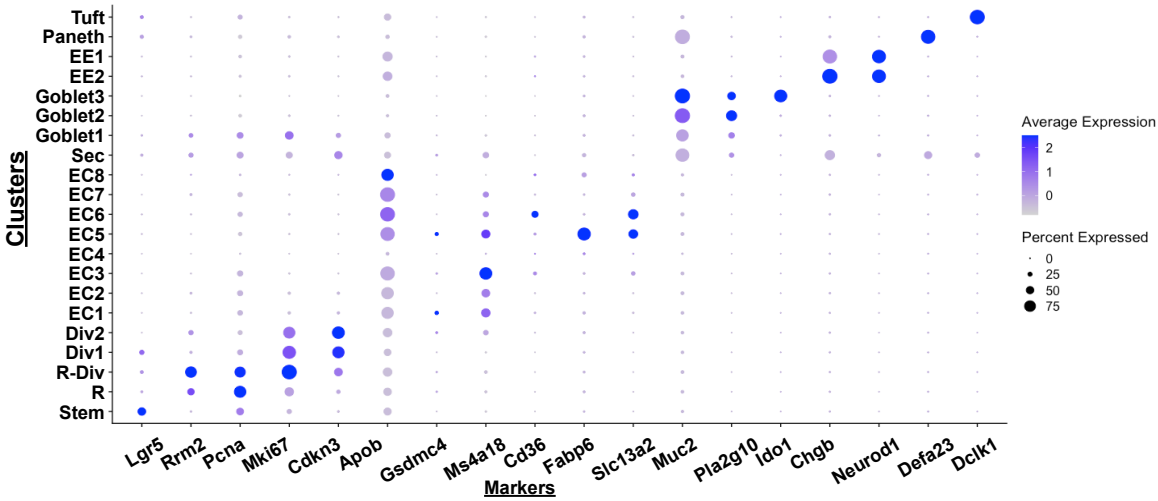

**c Fraction of total cells in each cluster**

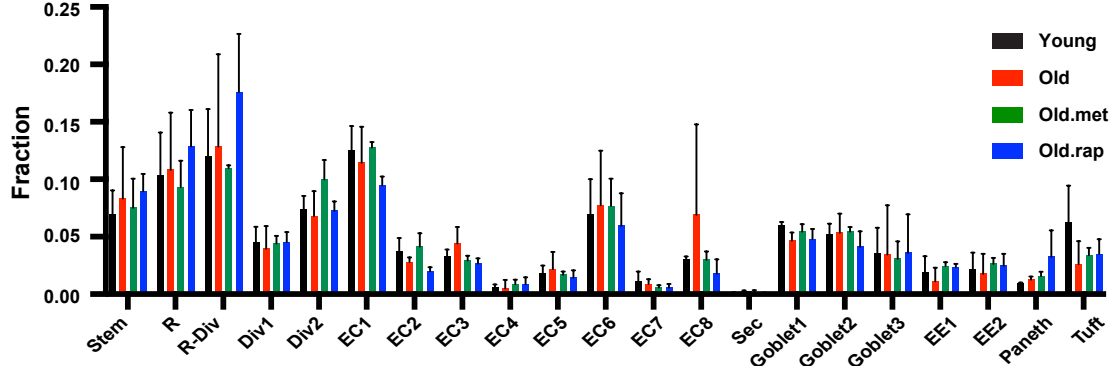

Figure S2

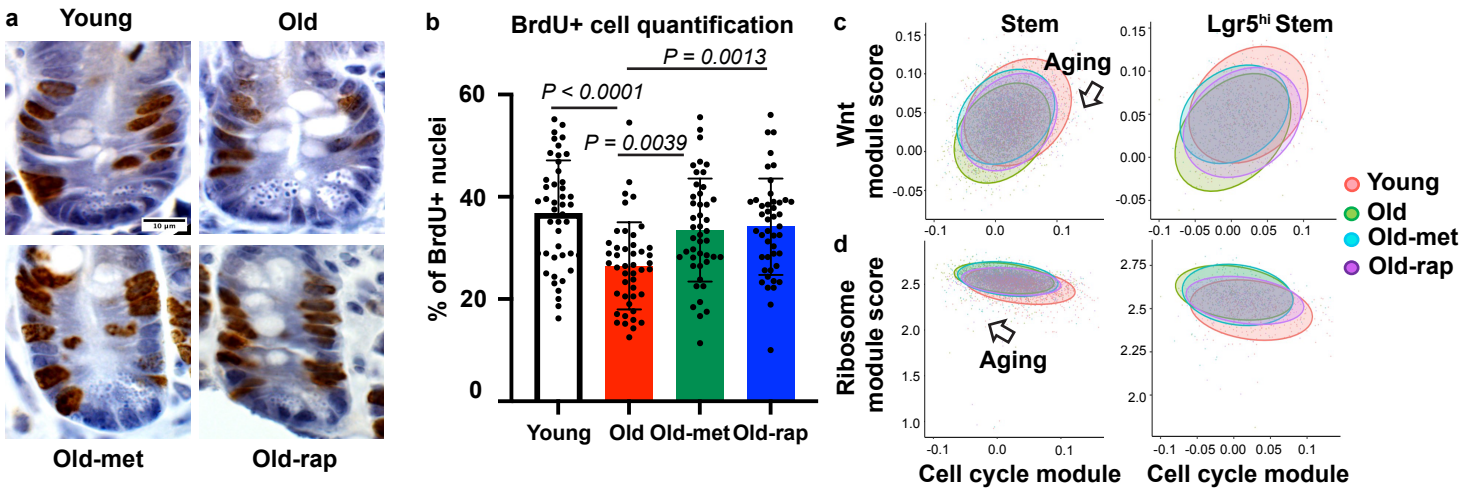

Figure S3

**a** Pathway analysis

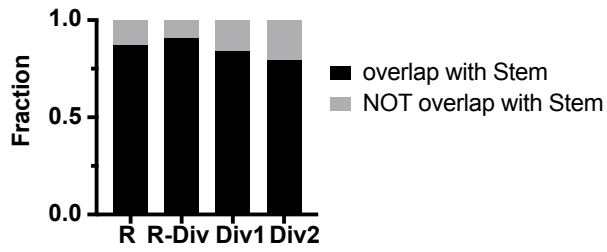

**b** Developmental trajectory plot

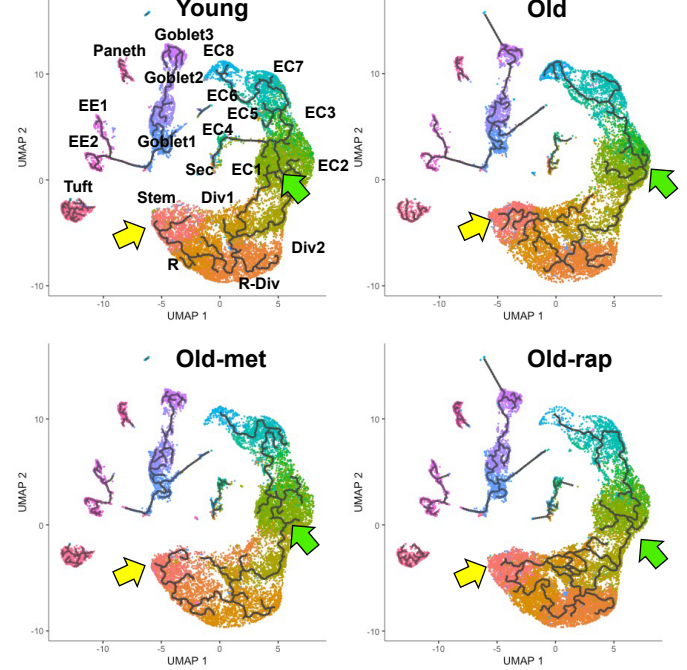

**c** Spatial marker expression along the crypt-villus axis

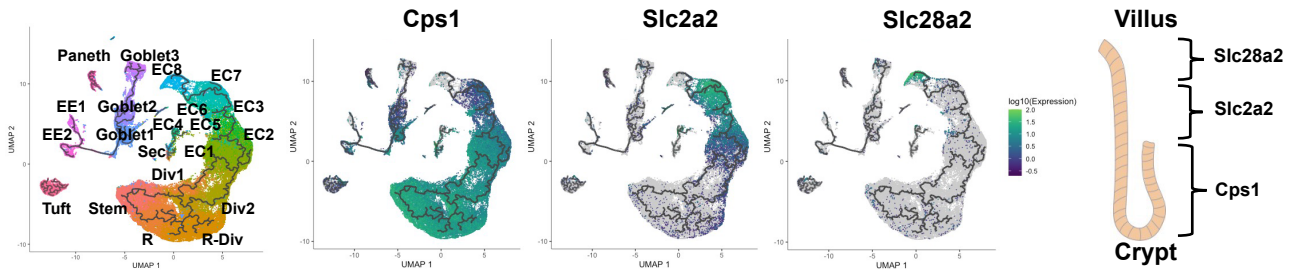

Figure S4

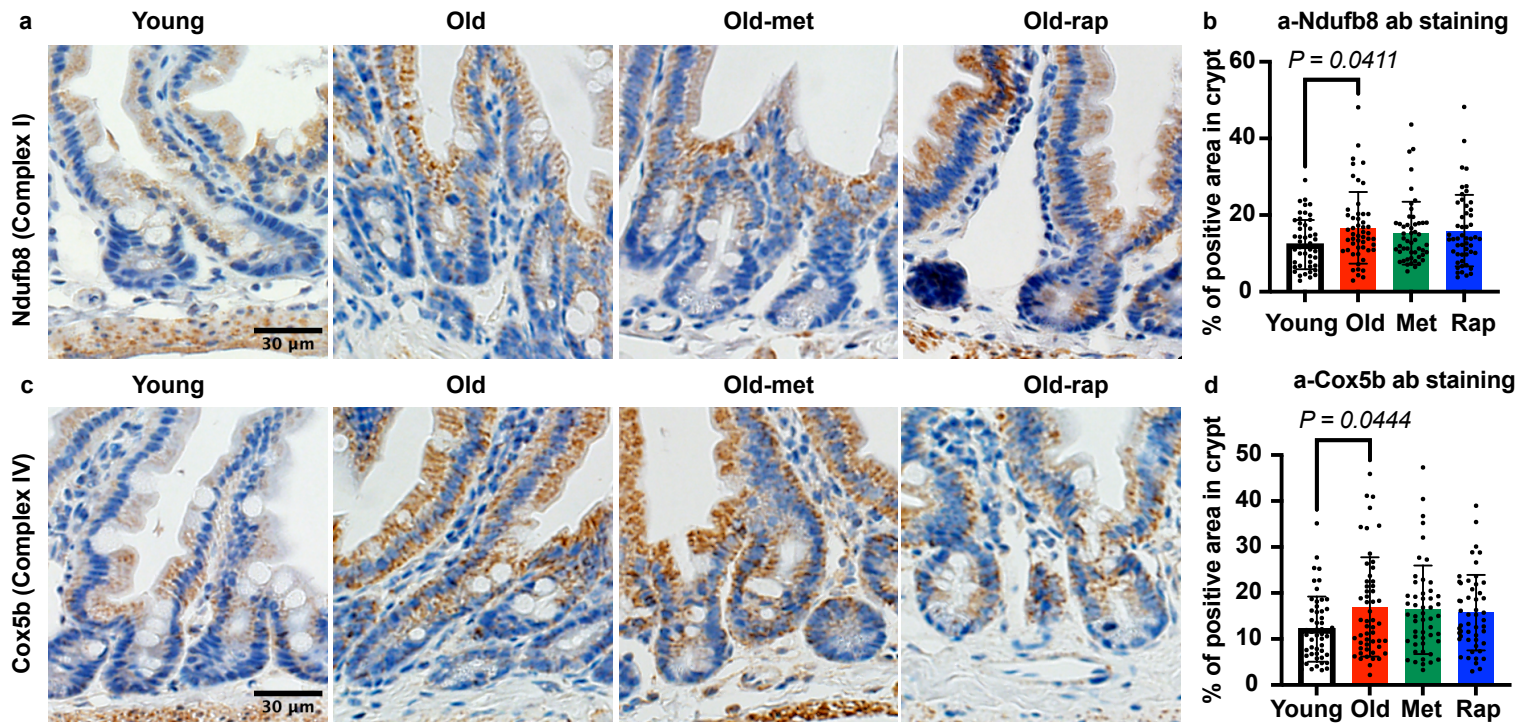

Supplement: ACEL-22-e13802-s001.pdf [file ACEL-22-e13802-s001.pdf]
